# Supplementary material for: Full-Length Transcriptome Sequencing Combined with RNA-Seq to Analyze Genes Related to Terpenoid Biosynthesis in Cinnamomum burmannii
Source: MDPI journal article supplement (doi:10.3390/cimb44090288), 2022-09-12
Supplement: s1 [file s1]

**Table S2.** Sequences and their primers used in the RT-qPCR.

| <b>Isoform</b> | <b>Length (bp)</b> | <b>Amplicon<br/>length (bp)</b> | <b>F primer<br/>location</b> | <b>R primer<br/>location</b> | <b>Gene Symbol</b> | <b>Gene Description</b>                                                                                  |
|----------------|--------------------|---------------------------------|------------------------------|------------------------------|--------------------|----------------------------------------------------------------------------------------------------------|
| Isoform0002990 | 1855               | 119                             | 1475-1492                    | 1575-1593                    | CYP72A15           | cytochrome P450 [Coptis japonica var. dissecta] [Coptis japonica]                                        |
| Isoform0005726 | 1607               | 127                             | 921-938                      | 1028-1047                    | CYP72A15           | cytochrome P450 [Coptis japonica var. dissecta] [Coptis japonica]                                        |
| Isoform0007560 | 1330               | 116                             | 662-679                      | 759-777                      | CYP72A15           | PREDICTED: cytochrome P450 CYP72A219-like [Nelumbo nucifera]                                             |
| Isoform0008306 | 1148               | 122                             | 693-712                      | 797-814                      | DAD2               | PREDICTED: probable strigolactone esterase DAD2 [Ricinus communis], sesquiterpenoid biosynthetic process |
| Isoform0008315 | 1164               | 142                             | 412-429                      | 536-553                      | Os01g0360600       | PREDICTED: dephospho-CoA kinase [Amborella trichopoda]                                                   |
| Isoform0008424 | 1118               | 132                             | 663-680                      | 776-794                      | XTH9               | PREDICTED: xyloglucan endotransglucosylase/hydrolase protein 9 [Nelumbo nucifera]                        |
| Isoform0008609 | 1064               | 116                             | 396-413                      | 493-511                      | CYP72A15           | cytochrome P450 [Coptis japonica var. dissecta] [Coptis japonica]                                        |
| Isoform0008823 | 954                | 116                             | 286-303                      | 383-401                      | CYP72A63           | cytochrome P450 [Coptis japonica var. dissecta] [Coptis japonica]                                        |
| Isoform0009335 | 444                | 137                             | 162-181                      | 280-298                      | --                 | -                                                                                                        |
| Isoform0009336 | 457                | 191                             | 48-67                        | 221-238                      | --                 | -                                                                                                        |
| Isoform0016328 | 2356               | 119                             | 895-914                      | 994-1013                     | DUF789             | domain-containing protein [Cephalotus follicularis]                                                      |
| Isoform0016988 | 2266               | 81                              | 171-189                      | 234-251                      | diterpene          | Metabolism                                                                                               |

---

geranylinalool  
synthase  
[Laurus nobilis]

---
